# Supplementary material for: Encapsulation of pterostilbene in nanoemulsions: influence of lipid composition on physical stability, in vitro digestion, bioaccessibility, and Caco-2 cell monolayer permeability
Source: Royal Society of Chemistry journal article supplement (doi:10.1039/c9fo01260e), 2019-01-01
Supplement: c9fo01260e1.pdf [file c9fo01260e1.pdf]

## Supplementary Material

Fig. S1

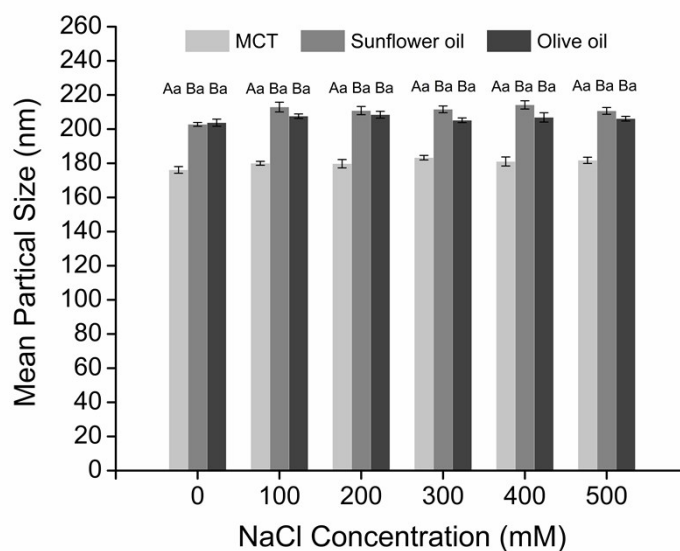

Fig. S1 Effect of ionic strength on the mean particle size of pterostilbene nanoemulsions. Different uppercase letters (A and B) compared between different carrier lipid types indicate significant difference ( $p < 0.05$ ). Same lowercase letters compared between different NaCl concentration indicate no significant difference ( $p > 0.05$ ).

Fig. S2

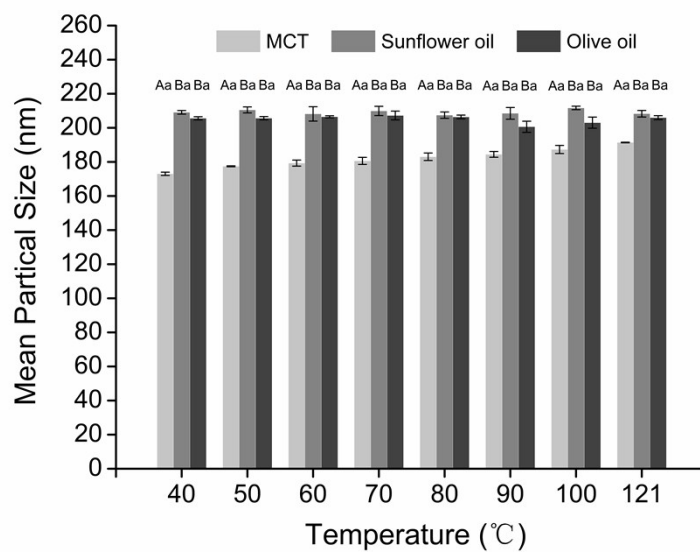

Fig. S2 Effect of temperature on the mean particle size of pterostilbene nanoemulsions. Different uppercase letters (A and B) compared between different carrier lipid types indicate significant difference ( $p < 0.05$ ). Same lowercase letters compared between different temperature indicate significant difference ( $p > 0.05$ ).

Fig. S3

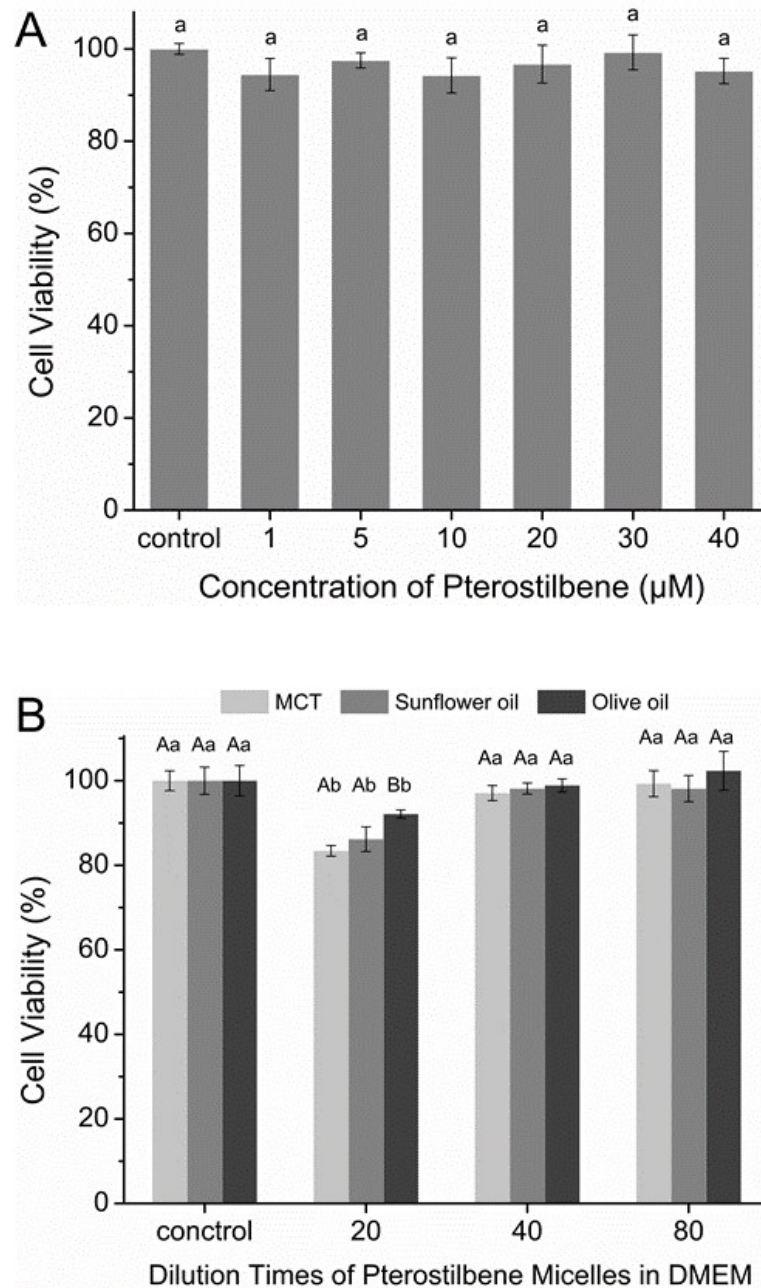

Fig. S3 (A) Cell viability of pterostilbene at different concentrations on Caco-2 cells. Same letters above the error bars indicate no significant difference ( $p > 0.05$ ). (B) Cell viability of three micelles containing pterostilbene obtained digestion at different dilution times (0, 20, 40, and 80 time) on Caco-2 cells. Different uppercase letters (A and B) above the error bars indicate significant difference ( $p < 0.05$ ) between different micelles. Different lowercase letters (a and b) above the error bars indicate significant difference ( $p < 0.05$ ) between different dilution times.
